# Supplementary material for: Lawsone-bentonite hybrid systems for pH-dependent sustained release of ciprofloxacin
Source: Royal Society of Chemistry journal article supplement (doi:10.1039/d2nj00288d), 2022-01-01
Supplement: d2nj00288d1.pdf [file d2nj00288d1.pdf]

## Lawsonite-Bentonite Hybrid Systems for pH-Dependent Sustained Release of Ciprofloxacin

P. Sirajunnisa,<sup>a</sup> Cheemadan Sabna,<sup>a</sup> A. Aswin,<sup>a</sup> S. Prathapan<sup>b</sup> and G. S. Sailaja<sup>\*a,c,d</sup>

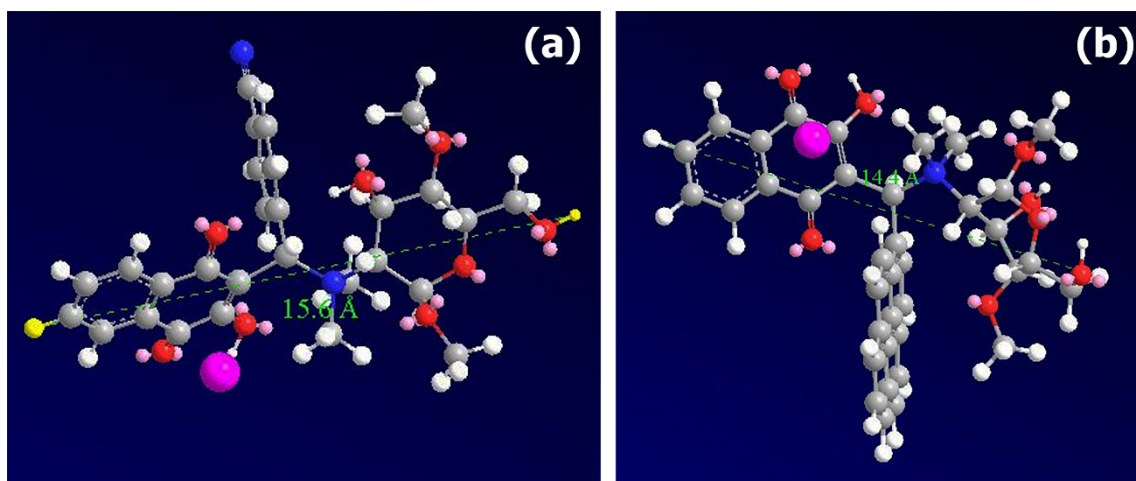

**Fig. S1.** Energy minimization diagram of (a) QLMNTCN and (b) QLMNTPY

**Table. S1.** CHN Elemental analysis of NaBen, QCB and QPB

| Sample | C%    | H%   | N%   |
|--------|-------|------|------|
| NaBen  | 0.15  | ND   | 0.07 |
| QCB    | 37.08 | 1.97 | 2.34 |
| QPB    | 47.04 | 3.29 | 3.42 |

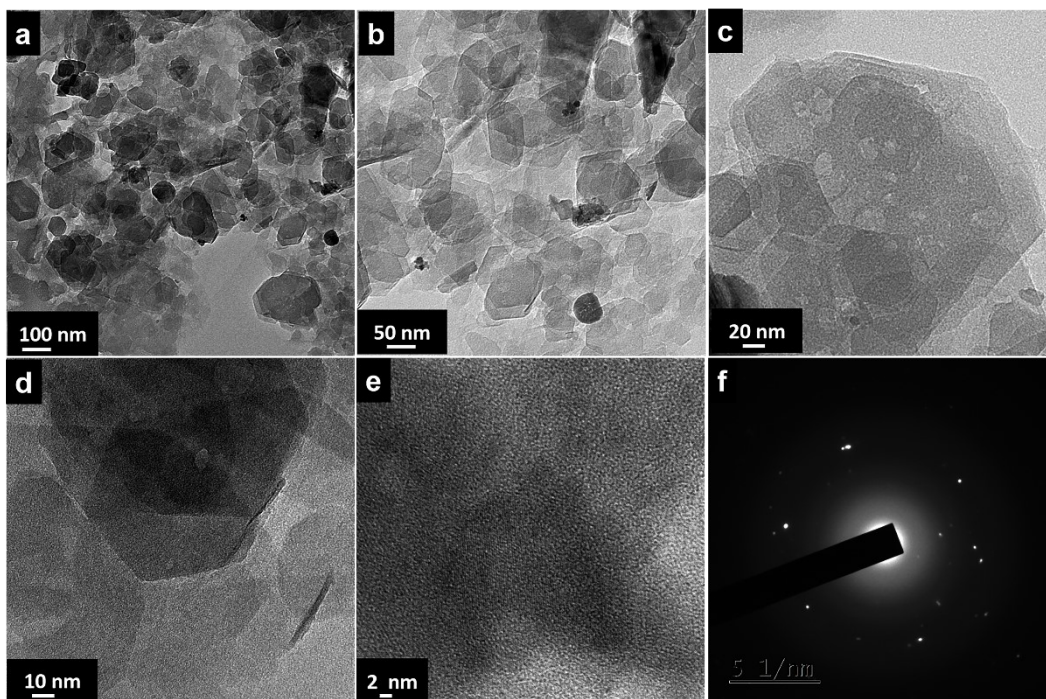

Fig. S2 TEM microstructures and SAED pattern of NaBen

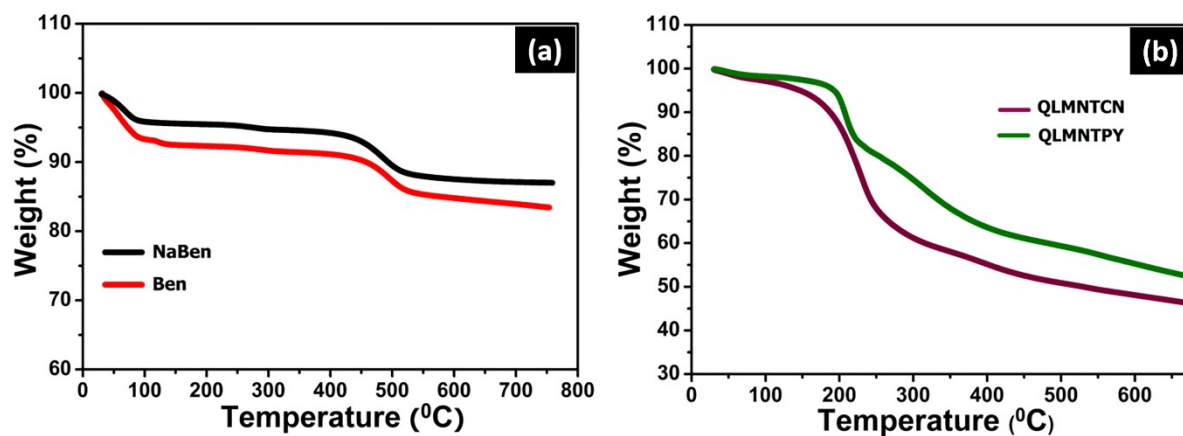

Fig. S3 Thermograms of (a) Ben, NaBen; (b) QLMNTCN and QLMNTPY
